# Supplementary material for: Synthesis, structure and spectral properties of O,N,N coordinating ligands and their neutral Zn(ii) complexes: a combined experimental and theoretical study
Source: Royal Society of Chemistry journal article supplement (doi:10.1039/c3dt51571k), 2013-01-01
Supplement: c3dt51571k.pdf [file c3dt51571k.pdf]

## Dalton Transactions

### *Electronic Supplementary Information*

Synthesis, structure and spectral properties of *O, N, N* coordinating  
ligands and their neutral Zn(II) complexes: a combined  
experimental and theoretical study<sup>†</sup>

**Amar Hens, Pallab Mondal, and Kajal Krishna Rajak\***

Inorganic Chemistry Section, Department of Chemistry, Jadavpur University, Kolkata,  
700 032, India

\* To whom correspondence should be addressed. Email: [kajalrajak@hotmail.com](mailto:kajalrajak@hotmail.com)

Jadavpur University

**Table S1** Selected Parameters for the Vertical Excitation (UV-vis Absorptions) and the Emission of HL<sup>1</sup>; Electronic Excitation Energies (eV) and Oscillator Strengths (*f*), Configurations of the Low-Lying Excited States of HL<sup>1</sup>; Calculation of the S<sub>0</sub>–S<sub>1</sub> Energy Gaps Based on Optimized Ground-State Geometries (UV-vis Absorption) and the Optimized Excited-State Geometries (Fluorescence) (THF used as solvent)

| Process    | Electronic Transitions          | Composition                        | Excitation energy    | Oscillator strength ( <i>f</i> ) | CI                  | λ <sub>exp</sub> (nm) |
|------------|---------------------------------|------------------------------------|----------------------|----------------------------------|---------------------|-----------------------|
| Absorbance | S <sub>0</sub> → S <sub>1</sub> | HOMO → LUMO                        | 2.6913eV<br>(460 nm) | 0.3835                           | 0.70491             | 468                   |
|            | S <sub>0</sub> → S <sub>3</sub> | HOMO – 1 → LUMO<br>HOMO → LUMO + 1 | 3.4268eV<br>(361 nm) | 0.3388                           | 0.63760<br>–0.29451 | 360                   |
| Emission   | S <sub>1</sub> → S <sub>0</sub> | HOMO → LUMO                        | 3.4882eV<br>(530 nm) | 0.2674                           | 0.70633             | 533                   |

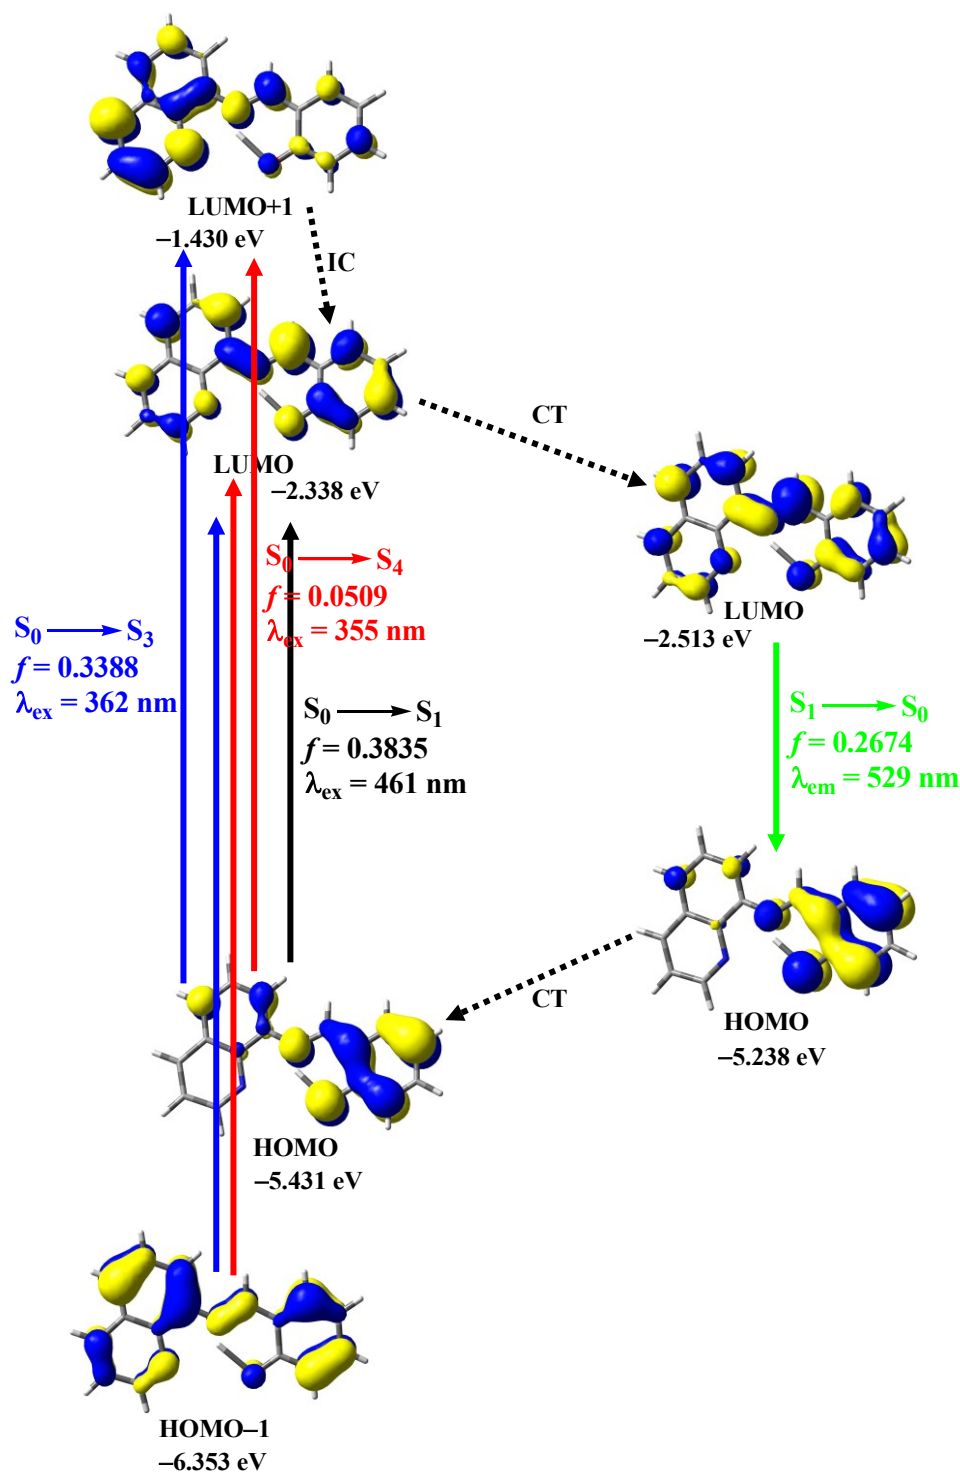

**Fig. S1** Frontier molecular orbitals involved in the UV-vis absorption and emission of HL<sup>1</sup>. IC stands for internal conversion and CT stands for conformation transformation. Excitation and radiative decay process are marked as solid lines and the non-radiative processes are marked by dotted lines.

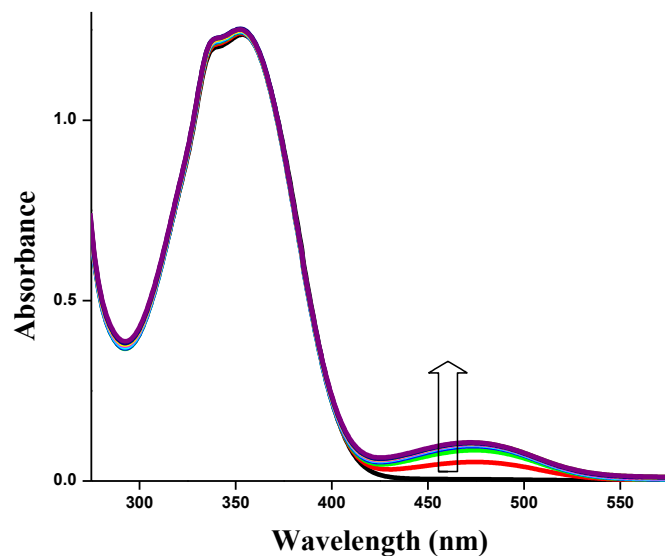

**Fig. S2** Spectrophotometric titrations of HL<sup>1</sup> (0.1 mM) with various numbers of equivalent of Zn(ClO<sub>4</sub>)<sub>2</sub>·6H<sub>2</sub>O in THF at room temperature ([Zn<sup>2+</sup>] = 0, 0.01, 0.02, 0.03, 0.04, 0.05 mM).

With increasing concentration of Zn<sup>2+</sup> ion the characteristic absorbance of the ligand (HL<sup>1</sup>) at 344 nm gradually decreases while the band at 468 nm gradually increases through an isosbestic point at 410 nm respectively. UV-vis titration study has been confirmed the formation of 1:2 complexes between Zn(II) and ligand. Absorption titration spectrum is given above.

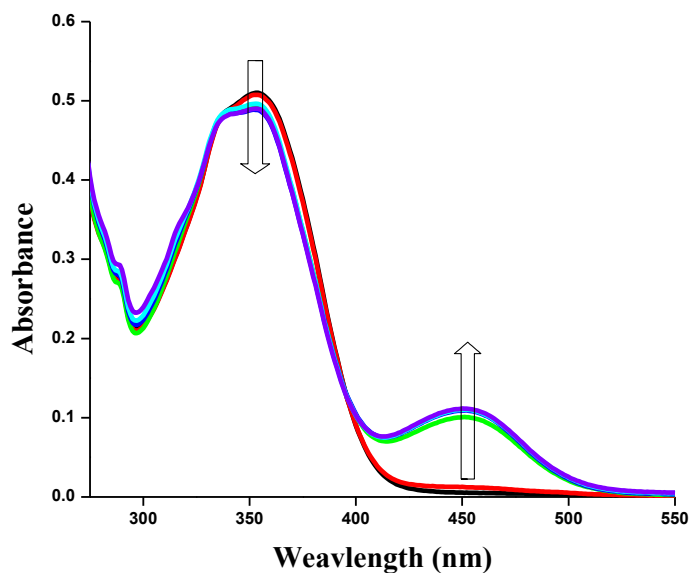

**Fig. S3** Spectrophotometric titrations of HL<sup>3</sup> (0.1 mM) with various numbers of equivalent of Zn(ClO<sub>4</sub>)<sub>2</sub>·6H<sub>2</sub>O in THF at room temperature ([Zn<sup>2+</sup>] = 0, 0.01, 0.04, 0.05 mM).

With increasing concentration of Zn<sup>2+</sup> ion the characteristic absorbance of the ligand (HL<sup>3</sup>) at 360 nm gradually decreases while the band at 450 nm gradually increases through an isosbestic point at 395 nm respectively. UV-vis titration study has been confirmed the formation of 1:2 complexes between Zn(II) and ligand. Absorption titration spectrum is given above.

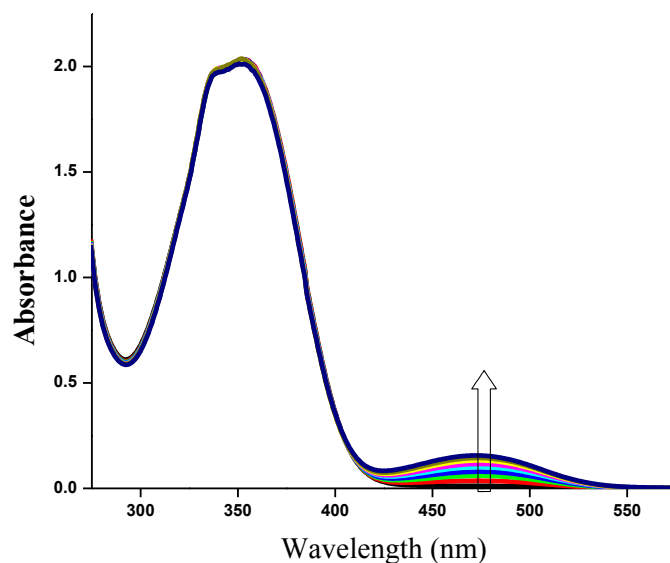

**Fig. S4** Spectrophotometric titrations of HL<sup>4</sup> (0.1 mM) with various numbers of equivalent of Zn(ClO<sub>4</sub>)<sub>2</sub>·6H<sub>2</sub>O in THF at room temperature ([Zn<sup>2+</sup>] = 0, 0.01, 0.02, 0.03, 0.04, 0.05 mM).

With increasing concentration of Zn<sup>2+</sup> ion the characteristic absorbance of the ligand (HL<sup>4</sup>) at 357 nm gradually decreases while the band at 473 nm gradually increases through an isosbestic point at 408 nm respectively. UV-vis titration study has been confirmed the formation of 1:2 complexes between Zn(II) and ligand. Absorption titration spectrum is given above.

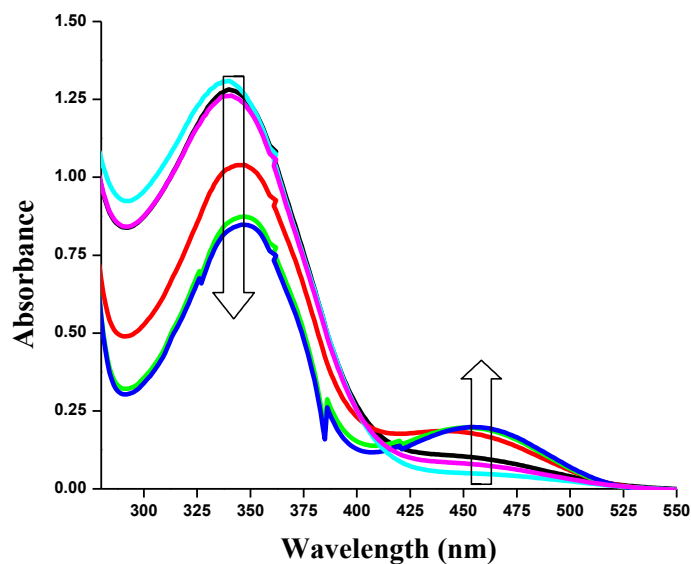

**Fig. S5** Spectrophotometric titrations of HL<sup>5</sup> (0.1 mM) with various numbers of equivalent of Zn(ClO<sub>4</sub>)<sub>2</sub>·6H<sub>2</sub>O in THF at room temperature ([Zn<sup>2+</sup>] = 0, 0.01, 0.02, 0.03, 0.04, 0.05 mM).

With increasing concentration of Zn<sup>2+</sup> ion the characteristic absorbance of the ligand (HL<sup>5</sup>) at 337 nm gradually decreases while the band at 454 nm gradually increases through an isosbestic point at 410 nm respectively. UV-vis titration study has been confirmed the formation of 1:2 complexes between Zn(II) and ligand. Absorption titration spectrum is given above.

**Table S2** Main calculated optical transition for complex 4 with composition in terms of molecular orbital contribution of the transition, Vertical excitation energies and Oscillator strength in THF

| Excitation | Composition         | Excitation energy    | Oscillator strength ( <i>f</i> ) | CI       | Assign | $\lambda_{\text{exp}}$ (nm) |
|------------|---------------------|----------------------|----------------------------------|----------|--------|-----------------------------|
| 1          | HOMO - 1 → LUMO     | 2.5201eV<br>(491 nm) | 0.2773                           | 0.50875  | ILCT   | 473                         |
|            | HOMO → LUMO + 1     |                      |                                  | -0.42459 | ILCT   |                             |
| 2          | HOMO - 1 → LUMO + 1 | 2.5327eV<br>(489 nm) | 0.1829                           | 0.64360  | ILCT   |                             |
|            | HOMO → LUMO         |                      |                                  | -0.19465 | ILCT   |                             |
| 3          | HOMO - 4 → LUMO     | 3.4909eV<br>(355 nm) | 0.1487                           | 0.57825  | ILCT   | 351                         |
|            | HOMO - 2 → LUMO     |                      |                                  | -0.33841 | ILCT   |                             |
| 4          | HOMO - 5 → LUMO     | 3.5361eV<br>(350 nm) | 0.2968                           | 0.56625  | ILCT   |                             |
|            | HOMO - 3 → LUMO     |                      |                                  | -0.2843  | ILCT   |                             |
|            | HOMO - 2 → LUMO + 1 |                      |                                  | 0.18359  | ILCT   |                             |



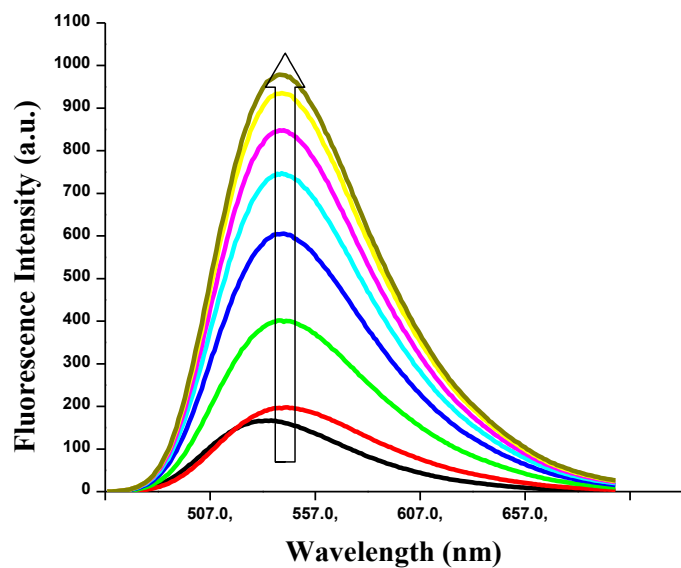

**Fig. S6** Fluorescence emission spectra of HL<sup>1</sup> upon addition of Zn(II) in THF,  $\lambda_{\text{ex}} = 466$  nm at room temperature ( $[\text{HL}^1] = 0.1 \text{ mM}$ ,  $[\text{Zn(II)}] = 0, 0.007, 0.014, 0.021, 0.028, 0.035, 0.042$  and  $0.05 \text{ mM}$ ).

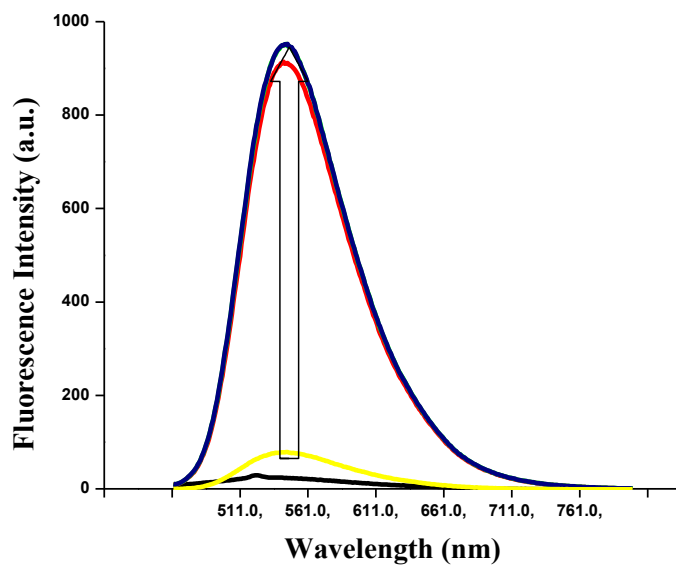

**Fig. S7** Fluorescence emission spectra of HL<sup>3</sup> upon addition of Zn(II) in THF,  $\lambda_{\text{ex}} = 450$  nm at room temperature ( $[\text{HL}^3] = 0.1 \text{ mM}$ ,  $[\text{Zn(II)}] = 0, 0.02, 0.04, \text{ and } 0.05 \text{ mM}$ ).

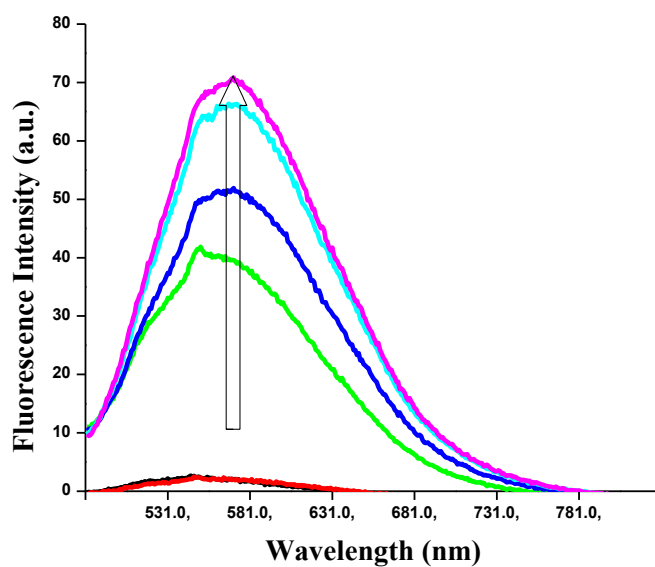

**Fig. S8** Fluorescence emission spectra of HL<sup>4</sup> upon addition of Zn(II) in THF,  $\lambda_{\text{ex}} = 473$  nm at room temperature ( [HL<sup>4</sup>] = 0.1mM, [Zn(II)] = 0, 0.02, 0.03, 0.04, 0.045 and 0.05 mM).

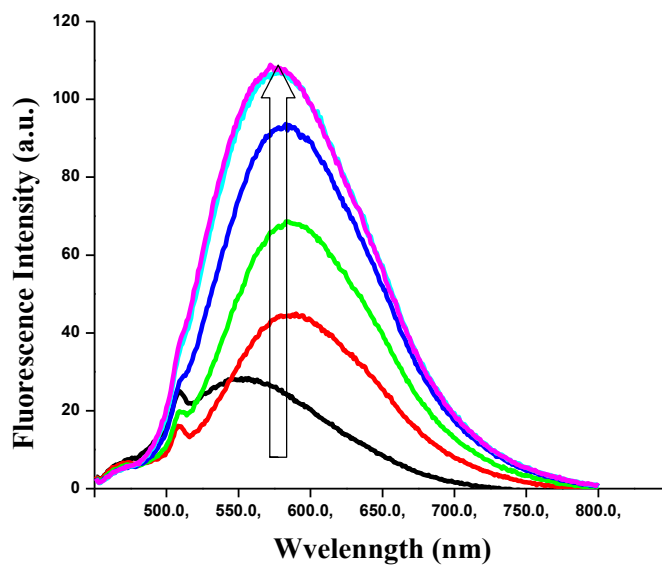

**Fig. S9** Fluorescence emission spectra of HL<sup>5</sup> upon addition of Zn(II) in THF,  $\lambda_{\text{ex}} = 454$  nm at room temperature ( [HL<sup>5</sup>] = 0.1mM, [Zn(II)] = 0, 0.01, 0.02, 0.03, 0.045 and 0.05 mM).
